# Supplementary material for: Reductions in Hydraulic Conductivity of Sands Caused by Microbially Induced Calcium Carbonate Precipitation
Source: Atypon-hosted journal article supplement (doi:10.1061/jggefk.gteng-11570), 2023-11-21
Supplement: supplemental_materials_jggefk.gteng-11570_baek.pdf [file supplemental_materials_jggefk.gteng-11570_baek.pdf]

## SUPPLEMENTAL MATERIALS

*ASCE Journal of Geotechnical and Geoenvironmental Engineering*

# Reductions in Hydraulic Conductivity of Sands Caused by Microbially Induced Calcium Carbonate Precipitation

Seung-Hun Baek, Tae-Hyuk Kwon, and Jason T. DeJong

**DOI:** 10.1061/JGGEFK.GTENG-11570

© ASCE 2023

[www.ascelibrary.org](http://www.ascelibrary.org)

**Table S1.** Specifications of X-ray CT and CMT imaging facilities

| Specification                                               | Values       |
|-------------------------------------------------------------|--------------|
| <b>Column-scale X-ray CT imaging</b>                        |              |
| <i>X-ray directional open type (DOTD) tube</i>              |              |
| Max. Voltage                                                | 220 kV       |
| Max. Current                                                | 3000 $\mu$ A |
| Focal spot                                                  | 6 $\mu$ m    |
| <i>Digital flat panel Detector with 16 inch intensifier</i> |              |
| A/D converter                                               | 16 bits      |
| Active Area                                                 | 400 x 400 mm |
| Total pixel number                                          | 2024 x 2024  |
| <b>Pore-scale X-ray CMT imaging</b>                         |              |
| <i>Nano-focus open X-ray source tube</i>                    |              |
| Max. Voltage                                                | 120 kV       |
| Max. Current                                                | 200 $\mu$ A  |
| Focal spot size                                             | 0.4 $\mu$ m  |
| <i>Digital flat panel detector with 16 inch intensifier</i> |              |
| A/D converter                                               | 16 bits      |
| Active area                                                 | 400 x 400 mm |
| Total pixel number                                          | 2024 x 2024  |

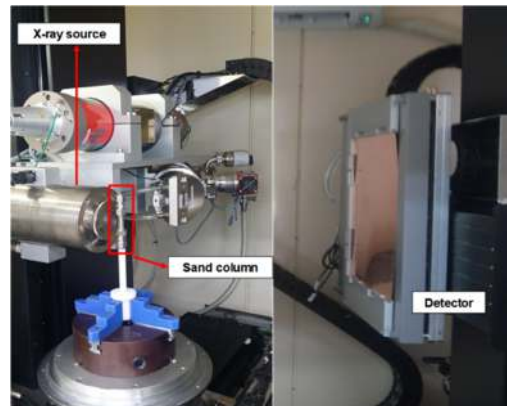

**Table S2.** X-ray CT and CMT imaging conditions

| Conditions                           | Values       |
|--------------------------------------|--------------|
| <b>Column-scale X-ray CT imaging</b> |              |
| Voltage used in this study           | 150 kV       |
| Current used in this study           | 1000 $\mu$ A |
| Exposure time                        | 1 sec        |
| Number of projection                 | 360          |
| Source-to-object distance            | 120 mm       |
| Pixel pitch                          | 50.9 $\mu$ m |
| <b>Pore-scale X-ray CMT imaging</b>  |              |
| Voltage used in this study           | 110 kV       |
| Current used in this study           | 100 $\mu$ A  |
| Exposure time                        | 1 sec        |
| Number of projection                 | 1200         |
| Source-to-object distance            | 44 mm        |
| Pixel pitch                          | 3–8 $\mu$ m  |

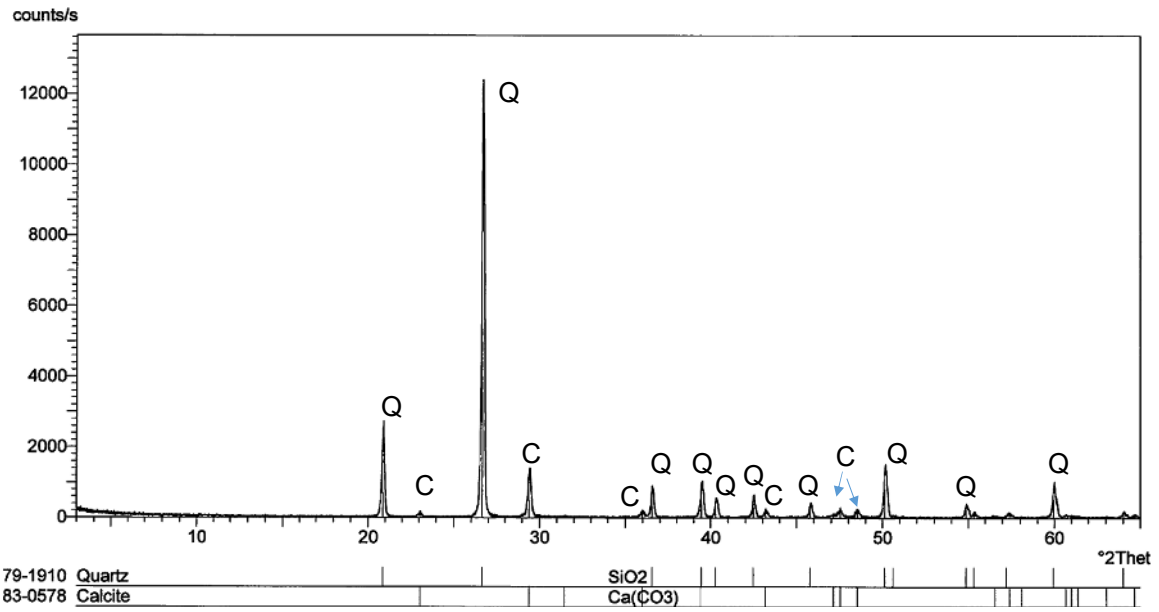

**Fig. S1.** The X-ray diffraction (XRD) analysis result of a MICP-treated sand sample. The result confirms that the host sand is mostly composed of quartz and the precipitated mineral is mostly calcite. The quartz and calcite content in this sample was 85% and 15%, respectively.
